# Supplementary material
Source: PubMed Central journal article supplement (PMC1567876)

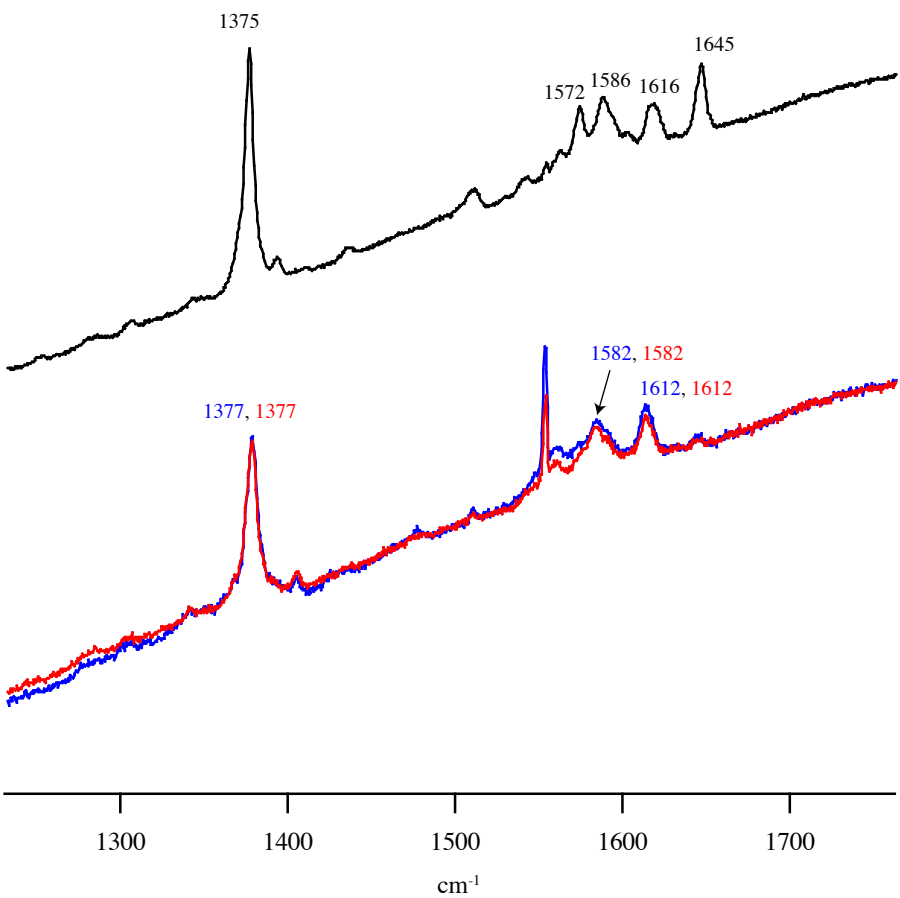

Supplement: pnas_0603159103_1.pdf [file pnas_0603159103_1.pdf]
